# Supplementary material for: Interaction of Monocyte-Derived Dendritic Cells with Ara h 2 from Raw and Roasted Peanuts
Source: MDPI journal article supplement (doi:10.3390/foods9070863), 2020-07-02
Supplement: s1 [file s1]

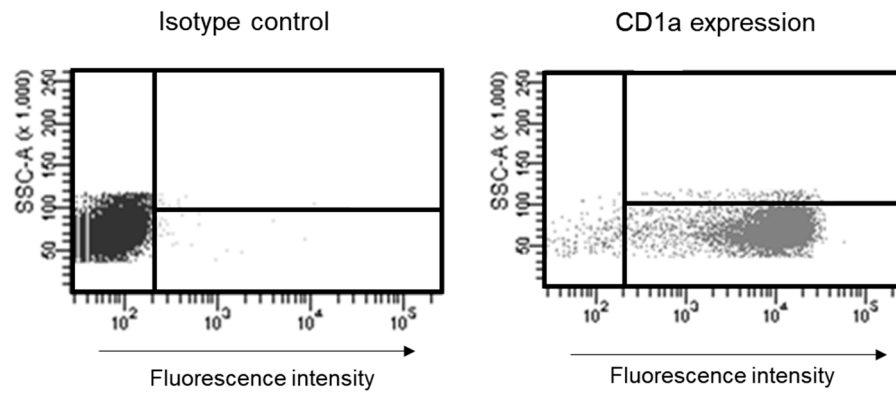

**Figure S1.** CD1a expression in MDDCs measured by flow cytometry. A representative experiment is shown.
